# Supplementary material for: Optimized Protocol for Isolation of Small Extracellular Vesicles from Human and Murine Lymphoid Tissues
Source: Int J Mol Sci. 2020 Aug 4;21(15):5586. doi: 10.3390/ijms21155586 (PMC7432511; doi:10.3390/ijms21155586)
Supplement: Supplementary file 1 [file ijms-21-05586-s001.pdf]

Supplemental Data –Optimized protocol for isolation of exosomes from human and murine lymphoid tissues. Bordas et al. IJMS 2020.

**Flotillin-1 (49 kDa)**

- 1<sup>st</sup> antibody BSA 5% in TBS-tween (1:1000), ON, 4° C (Cell Signalling #18634)
- 2<sup>nd</sup> antibody BSA 5% in PBS-tween (1:2000), 1h, RT (Rabbit)

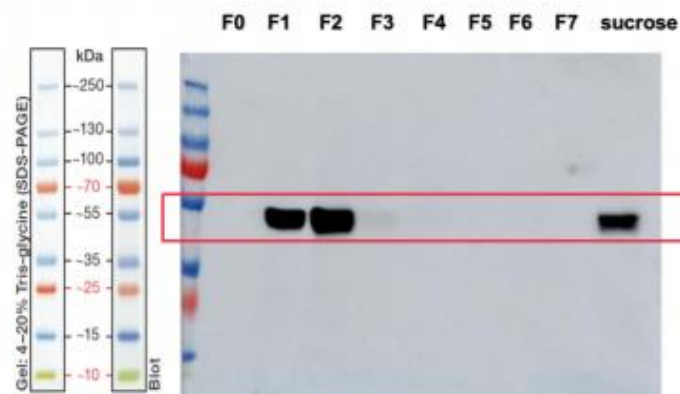

**CD81 (26 (20) kDa)**

- 1<sup>st</sup> antibody BSA 5% in TBS-tween (1:400), ON, 4° C (Pro Sci Inc 5195)
- 2<sup>nd</sup> antibody BSA 5% in PBS-tween (1:2000), 1h, RT (Rabbit)

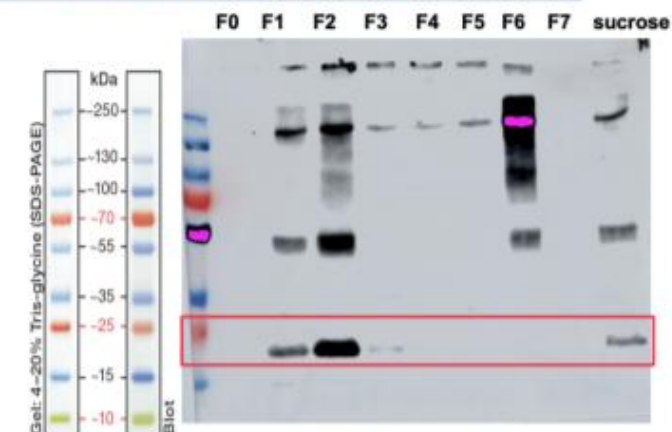

**CD9 (22,24,35 kDa)**

- 1<sup>st</sup> antibody BSA 5% in TBS-tween (1:2500), ON, 4° C (Cell Signalling #13174)
- 2<sup>nd</sup> antibody Milk 5% in PBS-tween (1:2000), 1h, RT (Rabbit)

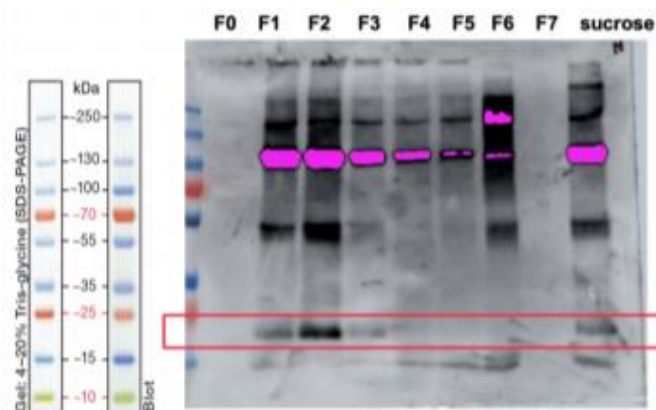

**GM130** (140 kDa – predicted 112 kDa)

- 1<sup>st</sup> antibody BSA 5% in TBS-tween (1:1000), ON, 4° C (Cell Signalling # 12480)
- 2<sup>nd</sup> antibody Milk 5% in PBS-tween (1:2000), 1h, RT (Rabbit)

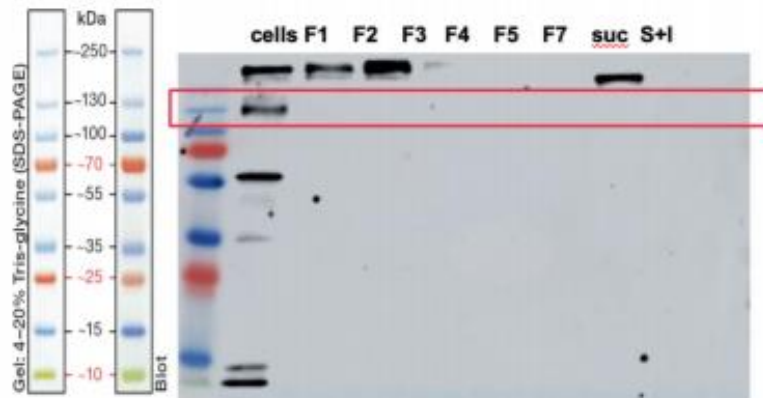

**Cytochrome c** (114 kDa)

- 1<sup>st</sup> antibody BSA 5% in TBS-tween (1:1000), ON, 4° C (Cell Signalling #)
- 2<sup>nd</sup> antibody Milk 5% in PBS-tween (1:2000), 1h, RT (Rabbit)

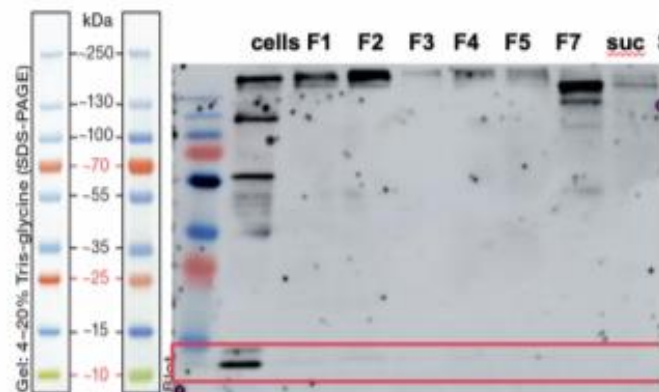

**Calnexin** (90 kDa)

- 1<sup>st</sup> antibody BSA 5% in TBS-tween (1:500), ON, 4° C (Gene Script, A-01240-40)
- 2<sup>nd</sup> antibody BSA 5% in PBS-tween (1:2000), 1h, RT (Rabbit)

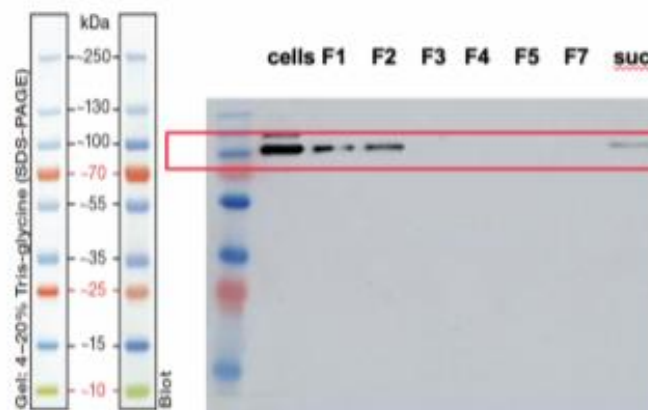

**Figure S1.** Immunoblot from human Lymph Nodes.

**CD81 (26 (20) kDa)**

- 1<sup>st</sup> antibody BSA 5% in TBS-tween (1:400), ON, 4° C (Pro Sci Inc 5195)
- 2<sup>nd</sup> antibody BSA 5% in PBS-tween (1:2000), 1h, RT (Rabbit)

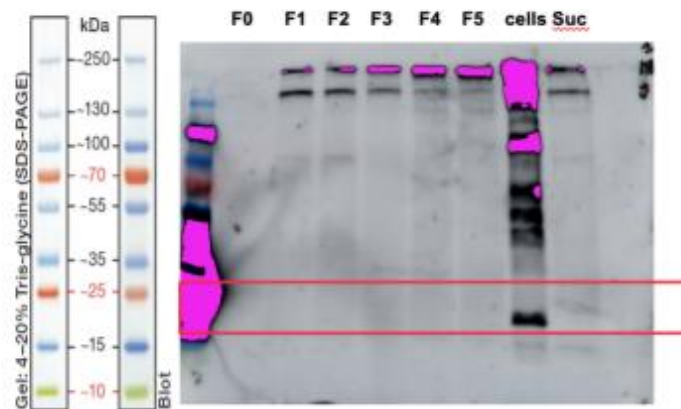

**Alix (95 kDa)**

- 1<sup>st</sup> antibody BSA 5% in TBS-tween (1:1000), ON, 4° C (Cell Signalling #2171)
- 2<sup>nd</sup> antibody BSA 5% in PBS-tween (1:2000), 1h, RT (Mouse)

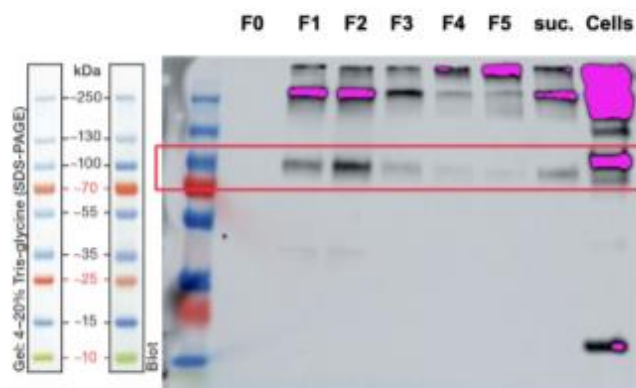

**ATPa5 (44 kDa)**

- 1<sup>st</sup> antibody BSA 5% in TBS-tween (1:1000), ON, 4° C (Abcam)
- 2<sup>nd</sup> antibody Milk 5% in PBS-tween (1:2000), 1h, RT (Mouse)

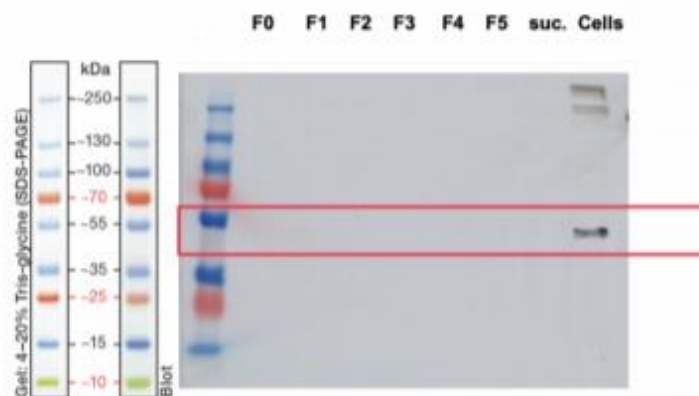

**Flotillin-1 (49 kDa)**

- 1<sup>st</sup> antibody BSA 5% in TBS-tween (1:1000), ON, 4° C (Cell Signalling #18634)
- 2<sup>nd</sup> antibody BSA 5% in PBS-tween (1:2000), 1h, RT (Rabbit)

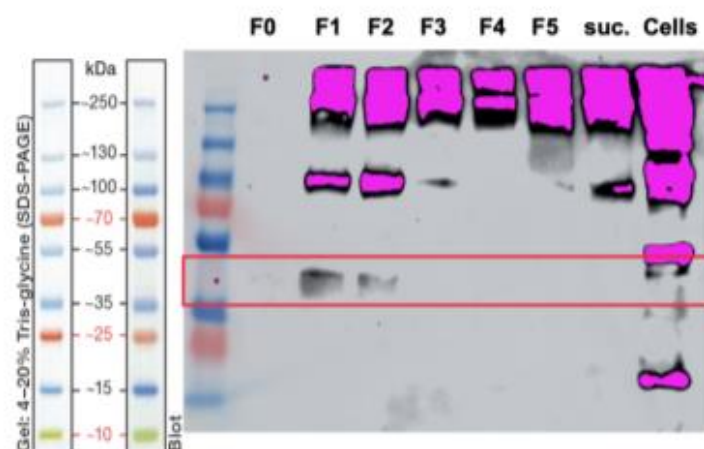

**Figure S2.** Immunoblot from murine Spleens.

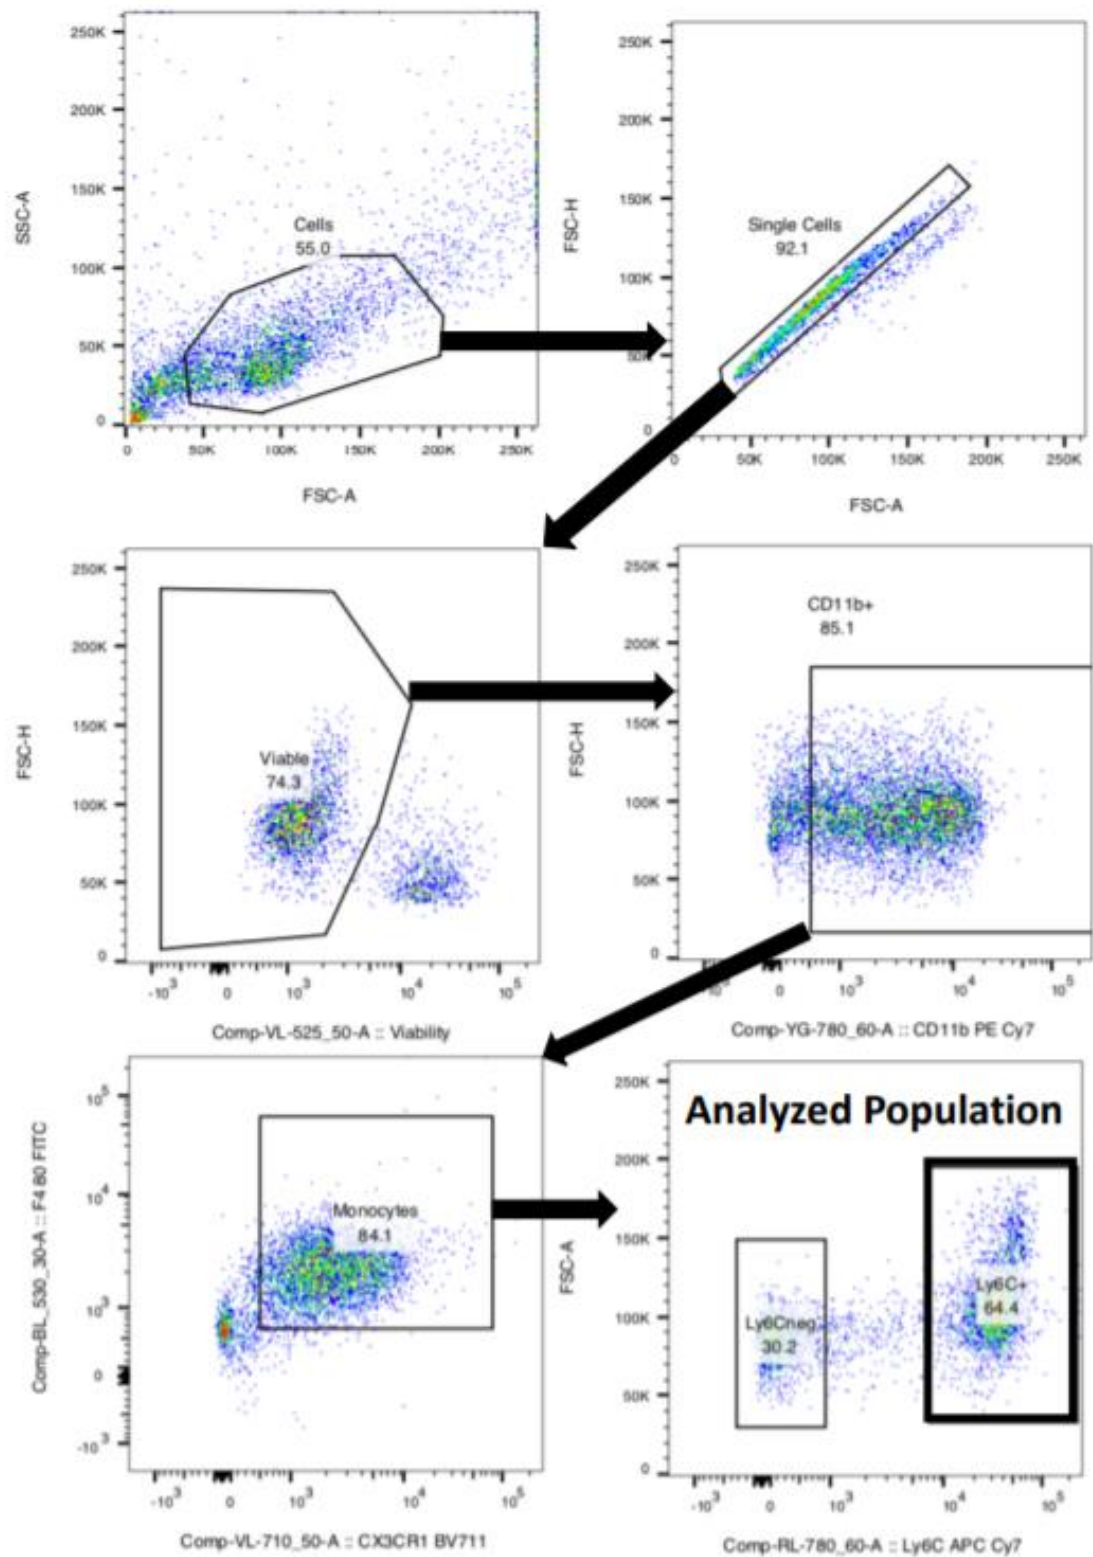

Figure S3. Flow cytometry gating strategy for monocytes.
